# Supplementary material
Source: Elsevier journal article supplement (https://www.sciencedirect.com/science/article/pii/S0210569121001923)
Supplement: mmc1 [file S0210569121001923:mmc1.pdf]

Encuesta sobre la transición de nutrición parenteral total a nutrición enteral en pacientes críticos en los hospitales de España

Transition from total parenteral nutrition to enteral nutrition in critically ill patients in Spain: a national survey

MATERIAL ADICIONAL

**Tabla 1 MS.**

Encuesta sobre el manejo de la transición de nutrición parenteral total a nutrición enteral (TNPANE) en el paciente crítico.

| DATOS DEL ENCUESTADO                                                                                                                                                                                                                                                                                                                |                                                                                                                                                                                               |
|-------------------------------------------------------------------------------------------------------------------------------------------------------------------------------------------------------------------------------------------------------------------------------------------------------------------------------------|-----------------------------------------------------------------------------------------------------------------------------------------------------------------------------------------------|
| <b>1.</b> Servicio al que pertenece:<br>a) Servicio de Medicina Intensiva<br>b) Servicio de Farmacia<br>c) Servicio de Dietética y Nutrición<br>d) Servicio de Endocrinología y Nutrición                                                                                                                                           | <b>2.</b> Tipo de hospital al que pertenece:<br>a) Público<br>b) Concertado<br>c) Privado                                                                                                     |
| <b>3.</b> Comunidad Autónoma:<br>a) Andalucía<br>b) Aragón<br>c) Asturias<br>d) Baleares<br>e) Canarias<br>f) Cantabria<br>g) Castilla-La Mancha<br>h) Castilla y León<br>i) Cataluña<br>j) Ceuta<br>k) Extremadura<br>l) Galicia<br>m) Madrid<br>n) Melilla<br>o) Murcia<br>p) Navarra<br>q) País Vasco<br>r) Rioja<br>s) Valencia | <b>4.</b> Tamaño del centro:<br>a) <200 camas<br>b) 200-500 camas<br>c) 501-1000 camas<br>d) >1000 camas                                                                                      |
| <b>5.</b> Número de unidades de cuidados intensivos en vuestro centro:<br>a) 1<br>b) 2<br>c) ≥3                                                                                                                                                                                                                                     | <b>6.</b> Número total de camas de cuidados intensivos en vuestro centro:<br>a) <10<br>b) 10-20<br>c) >20                                                                                     |
| ENCUESTA                                                                                                                                                                                                                                                                                                                            |                                                                                                                                                                                               |
| <b>7.</b> ¿El objetivo final de la TNPANE es garantizar la tolerancia de un determinado porcentaje de requerimientos calóricos y proteicos aportados por la NE?<br>a) Sí<br>b) No                                                                                                                                                   | <b>8.</b> ¿Qué porcentaje de los requerimientos calóricos y proteicos administrados por vía enteral consideraría necesario para poder suspender la NP? (si ha contestado sí en la pregunta 7) |
| <b>9.</b> ¿Se debería establecer un margen temporal definido para llevar a cabo la TNPANE?<br>a) Sí<br>b) No                                                                                                                                                                                                                        | <b>10.</b> ¿Qué margen de tiempo sugiere? (especificar en horas o días) (si ha contestado sí en la pregunta 9)                                                                                |
| <b>11.</b> ¿El objetivo de la transición debería ser conseguir la supresión de la NP?                                                                                                                                                                                                                                               | <b>12.</b> ¿La TNPANE en el paciente crítico es un procedimiento estandarizado en su centro?                                                                                                  |

|                                                                                                                                                                                                                                                                                                                                                                                       |                                                                                                                                                                                                                                                                                                                                           |
|---------------------------------------------------------------------------------------------------------------------------------------------------------------------------------------------------------------------------------------------------------------------------------------------------------------------------------------------------------------------------------------|-------------------------------------------------------------------------------------------------------------------------------------------------------------------------------------------------------------------------------------------------------------------------------------------------------------------------------------------|
| <p>a) Sí</p> <p>b) No</p>                                                                                                                                                                                                                                                                                                                                                             | <p>a) Sí</p> <p>b) No</p>                                                                                                                                                                                                                                                                                                                 |
| <p><b>13.</b> ¿Los criterios para iniciar la transición deberían ser los mismos criterios que se utilizan para iniciar la NE en el paciente crítico con intestino funcional?</p> <p>a) Sí</p> <p>b) No</p> <p>c) Otra</p>                                                                                                                                                             | <p><b>14.</b> ¿Qué criterios se deberían tener en cuenta?</p>                                                                                                                                                                                                                                                                             |
| <p><b>15.</b> ¿La dieta de elección para iniciar la TNPANE en el paciente crítico debería ser? (pregunta de opción múltiple)</p> <p>a) Dieta oligomérica o hidrolizada</p> <p>b) Dieta polimérica sin fibra</p> <p>c) Dieta polimérica con fibra</p> <p>d) Preparado peptídico basado en glutamina</p> <p>e) Indiferente</p> <p>f) Otra</p>                                           | <p><b>16.</b> En la práctica clínica cuando inicia la NE ¿Cómo lo suele hacer?</p> <p>a) A volúmenes progresivos si no hay complicaciones gastrointestinales</p> <p>b) A dosis plenas y manejo según aparecen complicaciones gastrointestinales</p>                                                                                       |
| <p><b>17.</b> ¿Aumentar progresivamente el volumen y la complejidad de la dieta podría mejorar la tolerancia enteral?</p> <p>a) Sí, la evidencia científica soporta esta afirmación</p> <p>b) Sí, aunque no hay evidencia científica</p> <p>c) No, aunque no hay evidencia científica</p> <p>d) No, hay evidencia científica en contra de esta sugerencia</p> <p>e) Lo desconozco</p> | <p><b>18.</b> ¿Durante la transición hay que descontar las calorías enterales de las administradas por vía parenteral?</p> <p>a) Sí, calculando y ajustando día a día la dosis de la NP</p> <p>b) Sí, aproximadamente, por ejemplo, reduciendo la NP a la mitad</p> <p>c) No, se suspende la NP cuando se inicia la NE</p> <p>d) Otra</p> |
| <p><b>19.</b> En base a su experiencia, ¿Los pacientes que realizan la TNPANE tienen una mayor incidencia de complicaciones gastrointestinales respecto a aquellos que inician directamente NE?</p> <p>a) Sí</p> <p>b) No</p>                                                                                                                                                         | <p><b>20.</b> ¿Qué complicaciones gastrointestinales cree que son más frecuentes en estos pacientes? (pregunta de opción múltiple)</p> <p>a) Aumento del residuo gástrico</p> <p>b) Diarrea</p> <p>c) Distensión abdominal</p> <p>d) Estreñimiento</p> <p>e) Regurgitación de la dieta</p> <p>f) Vómitos</p>                              |

Abreviaciones: NE = nutrición enteral; NP = nutrición parenteral; TNPANE = transición de nutrición parenteral total a nutrición enteral.

**Tabla 2 MS.**

Características de los encuestados y de los hospitales.

| <b>CARACTERÍSTICAS DE LOS ENCUESTADOS</b> |            |
|-------------------------------------------|------------|
| <b>Especialidad, n (%)</b>                |            |
| Servicio de Medicina Intensiva            | 65 (61,90) |
| Servicio de Farmacia                      | 36 (34,29) |
| Servicio de Dietética o Endocrinología    | 4 (3,81)   |
| <b>CARACTERÍSTICAS DE LOS HOSPITALES</b>  |            |
| <b>Dependencia funcional</b>              |            |
| Público                                   | 81 (77,14) |
| Concertado                                | 15 (14,29) |
| Privado                                   | 9 (8,57)   |
| <b>Comunidad Autónoma</b>                 |            |
| Andalucía                                 | 11 (10,48) |
| Aragón                                    | 2 (1,90)   |
| Asturias                                  | 3 (2,86)   |
| Baleares                                  | 4 (3,81)   |
| Canarias                                  | 1 (0,95)   |
| Cantabria                                 | 2 (1,90)   |
| Castilla y León                           | 2 (1,90)   |
| Castilla-La Mancha                        | 2 (1,90)   |
| Cataluña                                  | 39 (37,14) |
| Ceuta y Melilla                           | 0 (0,00)   |
| Extremadura                               | 1 (0,95)   |
| Galicia                                   | 3 (2,86)   |
| Madrid                                    | 15 (14,29) |
| Murcia                                    | 3 (2,86)   |
| Navarra                                   | 1 (0,95)   |
| País Vasco                                | 5 (4,76)   |
| Rioja                                     | 0 (0,00)   |
| Valencia                                  | 11 (10,48) |
| <b>Número de camas por hospital</b>       |            |
| <200 camas                                | 15 (14,29) |
| 200-500 camas                             | 42 (40,00) |
| 501-1000 camas                            | 34 (32,38) |
| >1000                                     | 14 (13,33) |
| <b>CARACTERÍSTICAS DE LAS UCI</b>         |            |
| <b>Número de UCI por hospital</b>         |            |

|                                            |            |
|--------------------------------------------|------------|
| 1                                          | 44 (41,90) |
| 2                                          | 29 (27,62) |
| ≥3                                         | 32 (30,48) |
| <b>Número de camas de UCI por hospital</b> |            |
| <10                                        | 13 (12,38) |
| 10-20                                      | 34 (32,38) |
| >20                                        | 58 (55,24) |

Abreviaciones: UCI = Unidad de Cuidados Intensivos.

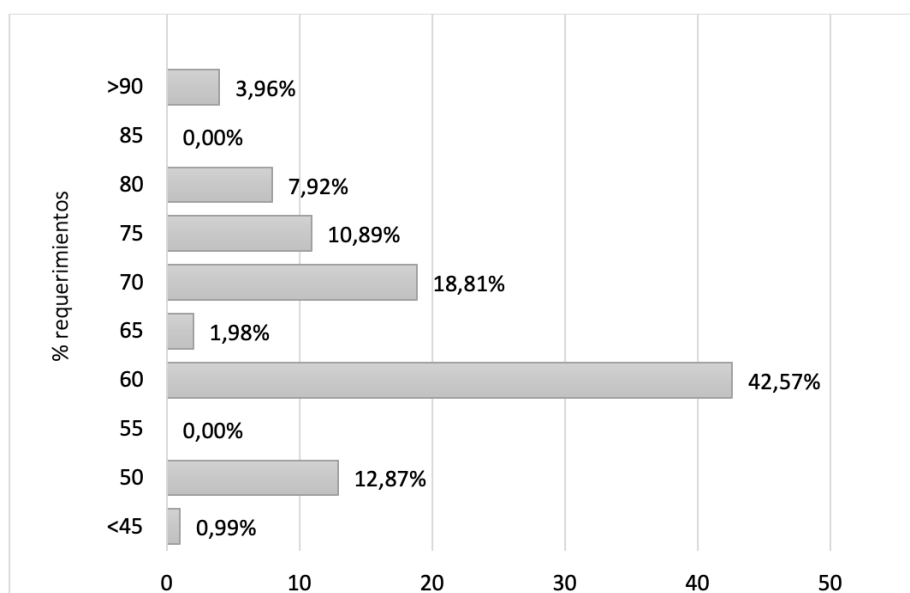

**Figura 1 MS.**

¿Qué porcentaje de los requerimientos calóricos y proteicos administrados por vía enteral consideraría necesario para poder suspender la NP? (N=101)

Abreviaciones: NP = nutrición parenteral.

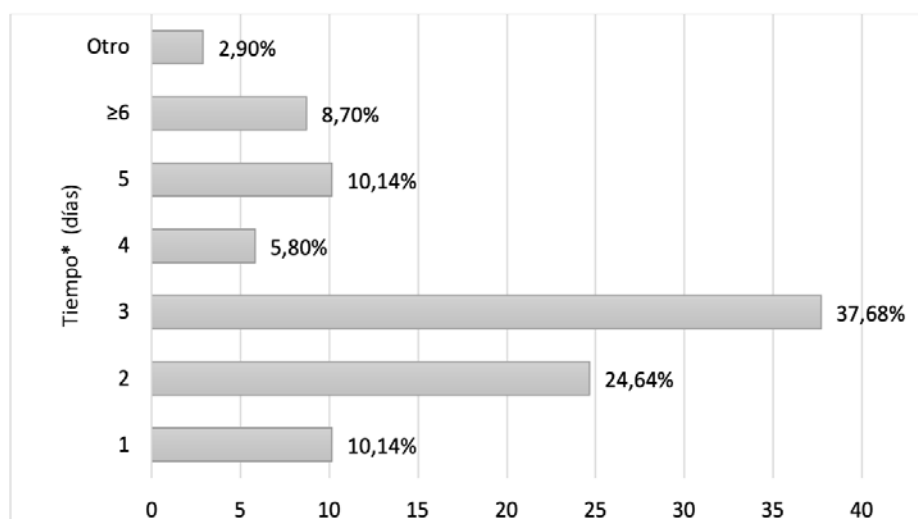

**Figura 2 MS.**

¿Qué margen de tiempo sugiere para llevar a cabo la TNPANE? (N=69)

Abreviaciones: TNPANE = transición de nutrición parenteral total a nutrición enteral. \*Tiempo máximo sugerido por los participantes.

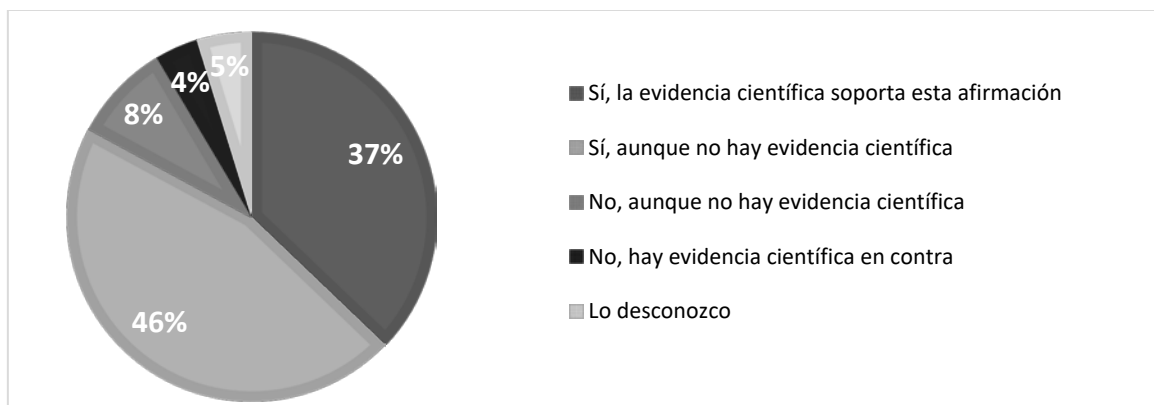

**Figura 3 MS.**

¿Aumentar progresivamente el volumen y la complejidad de la dieta podría mejorar la tolerancia enteral?



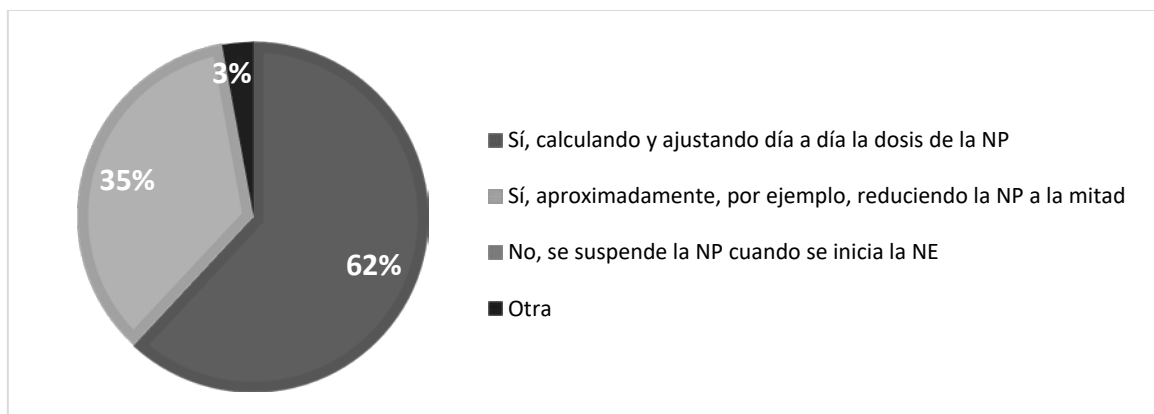

**Figura 4 MS.**

¿Durante la transición hay que descontar las calorías enterales de las administradas por vía parenteral?

Abreviaciones: NE = nutrición enteral; NP = nutrición parenteral.
